# Supplementary material for: Transcriptomic Response Analysis of Escherichia coli to Palladium Stress
Source: Front Microbiol. 2021 Oct 8;12:741836. doi: 10.3389/fmicb.2021.741836 (PMC8533678; doi:10.3389/fmicb.2021.741836)
Supplement: Supplementary file 4 [file Data_Sheet_4.xlsx]

## Sheet: Tab 1
Carbohydrate transport and metabolism:
Gene ID	Gene Name	Av. FC	Error	Description
b1478	adhP	n.s.	n.s.	Ethanol-active dehydrogenase/acetaldehyde-active reductase
b3139	agaC	n.s.	n.s.	Enzyme IIC Nag, PTS system; N-acetylgalactosamine-specific enzyme IIC; EIIC-Nag
b3140	agaD	n.s.	n.s.	Enzyme IID Nag, PTS system; N-acetylgalactosamine-specific enzyme IID; EIID-Nag; remnant of aga operon
b3141	agaI	n.s.	n.s.	Galactosamine-6-phosphate isomerase
b3131	agaR	n.s.	n.s.	aga regulon transcriptional repressor
b3133	agaV	n.s.	n.s.	Enzyme IIB Nag, PTS system; N-acetylgalactosamine-specific enzyme IIB; EIIB-Nag
b4087	alsA	n.s.	n.s.	D-allose ABC transporter ATP-binding protein
b4088	alsB	n.s.	n.s.	D-allose-binding protein, periplasmic
b4086	alsC	n.s.	n.s.	D-allose transport, membrane component
b4085	alsE	n.s.	n.s.	D-allulose-6-phosphate 3-epimerase
b4084	alsK	n.s.	n.s.	D-allose kinase
b1927	amyA	n.s.	n.s.	alpha-Amylase, cytoplasmic
b0875	aqpZ	n.s.	n.s.	Aquaporin Z, glycerol and water channel; RpoS regulon
b0062	araA	n.s.	n.s.	L-Arabinose isomerase; first step in arabinose catabolism; converts L-arabinose to L-ribulose
b0063	araB	n.s.	n.s.	Ribulokinase
b0061	araD	n.s.	n.s.	L-ribulose-5-phosphate 4-epimerase
b2841	araE	n.s.	n.s.	Low-affinity L-arabinose transport; L-arabinose proton symport
b1901	araF	11.4443	6.02771	L-Arabinose-binding protein, periplasmic
b1900	araG	n.s.	n.s.	Arabinose ABC transporter ATP-binding protein
b4460	araH	n.s.	n.s.	High-affinity L-arabinose transport, membrane protein
b0396	araJ	n.s.	n.s.	Arabinose-inducible MFS family transporter, function unknown; not involved in arabinose uptake or utilization
b2256	arnD	n.s.	n.s.	Undecaprenyl phosphate-aminoarabinose deformylase
b2716	ascB	n.s.	n.s.	Cryptic phospho-beta-glucosidase; expressed when AscG is mutated
b2715	ascF	n.s.	n.s.	PTS system EIIBC enzyme, beta-glucoside phosphotransferase; paralogous to bglF; cryptic unless AscG is mutated
b2182	bcr	n.s.	n.s.	Efflux transporter for bicyclomycin, cysteine and sulfonamides
b3531	bcsZ	n.s.	n.s.	Endo-1,4-D-glucanase; breaks down carboxymethylcellulose; periplasmic cellulase
b2901	bglA	n.s.	n.s.	Phospho-beta-glucosidase A; growth on arbutin or salicin when activated
b3721	bglB	n.s.	n.s.	Phospho-beta-glucosidase B; allows growth on arbutin or salicin when activated
b3722	bglF	n.s.	n.s.	PTS system EIIABC enzyme, beta-glucoside phosphotransferase; BglG kinase/dephosphorylase; membrane-bound protein; binds BglG
b3720	bglH	n.s.	n.s.	Outer membrane beta-glucoside porin, cryptic; lamB paralog
b2132	bglX	n.s.	n.s.	Periplasmic beta-glucosidase
b1736	chbA	n.s.	n.s.	PTS Enzyme IIA(Chb), N,N'-diacetylchitobiose utilization; trimeric
b1738	chbB	n.s.	n.s.	N,N'-diacetylchitobiose utilization, enzyme IIB(Chb) of the PTS transport system
b1737	chbC	n.s.	n.s.	PTS Enzyme IIC(Chb) for N,N'-diacetylchitobiose utilization
b1734	chbF	n.s.	n.s.	N,N'-diacetylchitobiose utilization, phospho-chitobiase; can hydrolyze a variety of phospho-beta-glucosides
b0616	citE	n.s.	n.s.	Citrate lyase beta chain
b0612	citT	n.s.	n.s.	Citrate/succinate antiporter
b2933	cmtA	n.s.	n.s.	Similar to mannitol phosphotransferase enzymes
b2934	cmtB	n.s.	n.s.	Protein-N-phosphohistidine sugar P-transferase; enzyme III of PEP-PTS cryptic mannitol transport
b0638	cobC	n.s.	n.s.	Probable alpha-ribazole-5'-phosphate phosphatase; potential partial cobalamin biosynthesis pathway
b2048	cpsG	n.s.	n.s.	Phosphomannomutase isozyme; colanic acid biosynthesis synthesis
b2417	crr	n.s.	n.s.	EIIA(Glc), phosphocarrier for glucose PTS transport; negative control of rpoS
b4138	dcuA	n.s.	n.s.	C4-dicarboxylate transporter, anaerobic
b4123	dcuB	n.s.	n.s.	C4-dicarboxylate transporter, anaerobic; DcuS co-sensor
b4383	deoB	n.s.	n.s.	Phosphopentomutase; deoxyribouratase
b0840	deoR	n.s.	n.s.	Repressor for deo operon, nupG and tsx; binds deoxyribose-5-phosphate inducer
b4477	dgoA	6.04879	0.716108	2-oxo-3-deoxygalactonate 6-phosphate aldolase
b3693	dgoK	5.12442	0.585643	2-oxo-3-deoxygalactonate kinase
b3691	dgoT	n.s.	n.s.	Galactonate transporter
b1200	dhaK	n.s.	n.s.	Dihydroxyacetone kinase, PTS-dependent, dihydroxyacetone-binding subunit; DhaK(2):DhaL:DhaM(2) complex
b3149	diaA	n.s.	n.s.	DnaA-binding protein; involved in the timing of the initiation of DNA replication; dnaA(Cs) suppressor; homodimer
b2365	dsdX	n.s.	n.s.	D-serine permease; D-serine tolerance
b3076	ebgA	n.s.	n.s.	Evolved beta-galactosidase, alpha subunit; normal substrate and function unknown; alpha(4)beta(4) holoenzyme
b3077	ebgC	n.s.	n.s.	Evolved beta-galactosidase, beta subunit; normal substrate and function unknown; alpha(4)beta(4) holoenzyme
b1850	eda	n.s.	n.s.	KHG/KDPG aldolase; 2-keto-4-hydroxyglutarate aldolase and 2-keto-3-deoxy-6-phosphogluconate aldolase activities; homotrimeric; 2-keto-4-hydroxyglutarate aldolase is also known as 4-hydroxy-2-oxoglutarate aldolase. 2-keto-3-deoxy-6-phosphogluconate aldolas
b1851	edd	n.s.	n.s.	Phosphogluconate dehydratase; growth on gluconate
b3673	emrD	n.s.	n.s.	Multidrug resistance pump; overexpression resistance to uncouplers and detergents
b2779	eno	n.s.	n.s.	Enolase; phosphoprotein; component of RNA degradosome
b0591	entS	n.s.	n.s.	Enterobactin exporter, iron-regulated; hyperlethality gene
b2927	epd	n.s.	n.s.	Erythrose-4-P dehydrogenase
b3093	exuT	n.s.	n.s.	Hexuronate permease, for glucuronate and galacturonate
b2925	fbaA	n.s.	n.s.	Fructose 1,6-bisphosphate aldolase, class II; binds Zn(II); homodimeric
b2097	fbaB	n.s.	n.s.	Fructose 1,6-bisphosphate aldolase, class I
b4232	fbp	n.s.	n.s.	Fructose-1,6-bisphosphatase; allosteric: inhibited by AMP
b4474	frlC	n.s.	n.s.	Fructoselysine 3-epimerase; interconverts fructoselysine and psicoselysine, allowing psicoselysine catabolism via the frl pathway
b3374	frlD	n.s.	n.s.	Fructoselysine 6-kinase
b2167	fruA	n.s.	n.s.	Fructose permease, PTS Enzyme IIBC component
b2169	fruB	n.s.	n.s.	Fructosephosphotransferase enzyme III
b2168	fruK	n.s.	n.s.	Fructose-1-phosphate kinase; 1-phosphofructokinase
b3900	frvA	n.s.	n.s.	Predicted fructose-like PTS system enzyme IIA
b3899	frvB	n.s.	n.s.	Predicted fructose-like PTS system enzyme IIBC
b3898	frvX	n.s.	n.s.	Peptidase homolog, function unknown
b3947	frwA	9.25041	2.45228	Predicted fructose-like phosphotransferase system (PTS) enzyme I; also has N-terminal Hpr-like domain and C-terminal Enzyme IIA domain
b3950	frwB	n.s.	n.s.	Predicted fructose-like PTS system enzyme IIB, component 1
b3949	frwC	n.s.	n.s.	Predicted fructose-like PTS system enzyme IIC
b3953	frwD	n.s.	n.s.	Predicted fructose-like PTS system enzyme IIB, component 2
b2383	fryA	n.s.	n.s.	Putative fructose-like PTS system Enzyme I; also contains Hpr and EIIA domains
b2387	fryB	n.s.	n.s.	Predicted fructose-like PTS system Enzyme IIB
b2386	fryC	n.s.	n.s.	Putative fructose-like PTS system Enzyme IIC
b0825	fsaA	n.s.	n.s.	Fructose-6-phosphate aldolase A
b3946	fsaB	n.s.	n.s.	Fructose-6-phosphate aldolase B
b2800	fucA	5.57699	1.06573	L-fuculose-1-phosphate aldolase
b2802	fucI	12.3615	0.186418	L-Fucose isomerase
b2803	fucK	6.52505	0.563157	L-Fuculose kinase
b2801	fucP	22.541	9.37	Fucose permease
b2805	fucR	4.25045	0.441014	Positive regulatory protein for fuc regulon
b2804	fucU	n.s.	n.s.	L-Fucose mutarotase
b0757	galK	n.s.	n.s.	Galactokinase
b0756	galM	n.s.	n.s.	Galactose mutarotase, aldose-1-epimerase; monomeric
b2943	galP	n.s.	n.s.	D-Galactose/H+ symporter
b0758	galT	n.s.	n.s.	Galactose-1-phosphate uridylyltransferase; Rob regulon, repressed
b1779	gapA	n.s.	n.s.	Glyceraldehyde 3-P dehydrogenase A
b3128	garD	5.13212	0.507572	D-galactarate dehydratase; uxaA paralog; contains conserved CxxS redox motif
b3124	garK	n.s.	n.s.	Glycerate 2-kinase, glycolate-, glycerate- or glucarate-inducible; GKI; produces 2-phospho-glycerate
b3126	garL	n.s.	n.s.	2-dehydro-3-deoxygalactarate aldolase; homohexameric
b3127	garP	22.882	5.93341	Probable D-galactarate transporter, membrane protein
b2094	gatA	n.s.	n.s.	Galactitol-specific PTS system EIIA component
b2093	gatB	-5.34727	0.721106	Galactitol-specific PTS system EIIB component
b2092	gatC	n.s.	n.s.	Galactitol-specific PTS system EIIC component
b2096	gatY	4.50455	0.253709	D-Tagatose-1,6-bisphosphate aldolase, class II; requires GatZ subunit for full activity and stability
b2095	gatZ	n.s.	n.s.	Tagatose bisphosphate aldolase GatYZ subunit; required for full activity and stabilty of GatY
b0124	gcd	-39.4882	1.76329	Glucose dehydrogenase (pyrroloquinoline-quinone) quinoprotein; inner membrane protein
b3429	glgA	n.s.	n.s.	Glycogen synthase
b3432	glgB	n.s.	n.s.	1,4-alpha-glucan branching enzyme; glycogen branching enzyme
b3430	glgC	3.69574	0.196829	Glucose-1-phosphate adenylyltransferase; ADP-glucose pyrophosphorylase
b3428	glgP	n.s.	n.s.	Glycogen phosphorylase; alpha-glucan phosphorylase
b3431	glgX	n.s.	n.s.	Glycogen debranching enzyme
b2388	glk	n.s.	n.s.	Glucokinase
b3176	glmM	n.s.	n.s.	Phosphoglucosamine mutase; UDP-GlcNAc pathway, peptidoglycan, lipopolysaccharide synthesis; mRNA stability effects
b3927	glpF	26.5021	5.53766	Aquaglyceroporin; glycerol facilitator
b3423	glpR	n.s.	n.s.	Repressor of glp regulon, induced by glycerol phophate; tetrameric
b2240	glpT	57.8131	11.0884	sn-Glycerol-3-phosphate permease; fosfomycin sensitivity
b3925	glpX	n.s.	n.s.	Fructose 1,6 bisphosphatase; induced by glycerol, in glpFKX operon, not required for growth on glycerol
b0514	glxK	n.s.	n.s.	Glycerate 3-kinase, glyoxylate-inducible; GKII; produces 3-phospho-glycerate
b0222	gmhA	n.s.	n.s.	Phosphoheptose isomerase; D-sedoheptulose 7-phosphate isomerase; GDP-heptose biosynthesis; T-phage resistance
b2029	gnd	n.s.	n.s.	6-phosphogluconate dehydrogenase, decarboxylating
b3437	gntK	n.s.	n.s.	Gluconokinase, thermoresistant
b4321	gntP	5.79266	0.729853	Fructuronate and gluconate transporter
b3415	gntT	n.s.	n.s.	High-affinity gluconate transport
b4476	gntU	n.s.	n.s.	Low-affinity gluconate transport protein, membrane protein
b0755	gpmA	n.s.	n.s.	Phosphoglycerate mutase, 2,3-bisphosphoglycerate-dependent; dPGM; Fur regulon; dimeric
b3612	gpmM	n.s.	n.s.	Phosphoglycerate mutase, Mn-dependent, cofactor-independent; iPGM; monomeric
b0477	gsk	n.s.	n.s.	Inosine-guanosine kinase
b2789	gudP	n.s.	n.s.	Probable D-glucarate transporter, membrane protein
b1103	hinT	n.s.	n.s.	Activator of DadA, D-alanine catabolism; purine nucleoside phosphoramidase; aminoacyl-adenylate hydrolase
b0508	hyi	n.s.	n.s.	Hydroxypyruvate isomerase, glyoxylate-inducible; product is tartronate semialdehyde
b2077	iceT	n.s.	n.s.	Putative arabinose efflux transporter
b4268	idnK	n.s.	n.s.	D-Gluconate kinase
b4265	idnT	n.s.	n.s.	L-Idonate transporter; also transports 5-keto-D-gluconate (Reed, 2006)
b3771	ilvD	n.s.	n.s.	Dihydroxyacid dehydratase; homodimeric
b3137	kbaY	n.s.	n.s.	Ketose 1,6-bisphosphate aldolase, class II; D-tagatose 1,6-bisphosphate aldolase; requires KbaZ subunit for full activity and stability
b3132	kbaZ	n.s.	n.s.	Ketose bisphosphate aldolase KbaYZ subunit; required for full activity and stabilty of KbaY
b3526	kdgK	n.s.	n.s.	Ketodeoxygluconokinase
b3197	kdsD	n.s.	n.s.	D-arabinose 5-phosphate isomerase; LPS biosynthesis
b2843	kduI	n.s.	n.s.	4-deoxy-L-threo-5-hexosulose-uronate ketol-isomerase; 5-keto-4-deoxyuronate isomerase
b2587	kgtP	n.s.	n.s.	alpha-Ketoglutarate permease
b0344	lacZ	n.s.	n.s.	beta-D-Galactosidase
b4036	lamB	n.s.	n.s.	Maltoporin, maltose high-affinity uptake system; phage lambda receptor protein
b4356	lgoT	n.s.	n.s.	L-galactonate transporter; mutants fail to grow on L-galactonate (Reed, 2006); membrane protein
b2660	lhgO	n.s.	n.s.	L-2-hydroxyglutarate oxidase; second gene in csiD-lhgO-gabDTP-csiR operon
b1513	lsrA	42.1636	7.50577	Autoinducer 2 (AI-2) import ATP-binding protein; essential for aerobic growth; upregulated in biofilms
b1516	lsrB	4.01607	0.230614	Autoinducer-2 (AI-2)-binding protein
b1514	lsrC	10.4223	1.849	Autoinducer 2 (AI-2) import system permease protein
b1515	lsrD	9.63571	1.45231	Autoinducer-2 (AI-2) import system permease protein
b1517	lsrF	n.s.	n.s.	Function unknown, involved in AI-2 catabolism
b1511	lsrK	9.84355	0.521948	Autoinducer-2 (AI-2) kinase; upregulated in biofilms
b3580	lyxK	n.s.	n.s.	L-xylulose kinase; novel pathway for utilization of lyxose via xylulose through rhamnose and pentose pathways; 3-keto-L-gulonate kinase; possibly involved in the utilization of L-dehydroascorbate (2,3-diketo-L-gulonate)
b0394	mak	n.s.	n.s.	Cryptic manno(fructo)kinase
b4034	malE	3.617	0.688919	Maltose-binding protein, periplasmic; MBP; substrate recognition for active transport of and chemotaxis toward maltose and maltodextrin
b4033	malF	n.s.	n.s.	Maltose transport complex, inner membrane-spanning subunit
b4032	malG	n.s.	n.s.	Maltose transport complex, inner membrane-spanning subunit
b4035	malK	4.43577	0.652101	Maltose transport complex, ATP-binding subunit
b3417	malP	n.s.	n.s.	Maltodextrin phosphorylase
b3416	malQ	n.s.	n.s.	Amylomaltase
b3571	malS	n.s.	n.s.	alpha-Amylase, periplasmic
b1621	malX	4.44088	0.354816	PTS enzyme II homolog; malI regulated
b0403	malZ	n.s.	n.s.	Maltodextrin glucosidase
b1613	manA	n.s.	n.s.	Mannose-6-phosphate isomerase
b1817	manX	6.52027	0.488107	Mannose permease, EIIAB component; phosphotransferase system
b1818	manY	3.71029	0.148712	Mannose permease, EIIC component; phosphotransferase system
b1819	manZ	n.s.	n.s.	Mannose permease, EIID component; phosphotransferase system
b4119	melA	n.s.	n.s.	alpha-Galactosidase
b4120	melB	n.s.	n.s.	Melibiose permease; thiomethylgalactoside permease II
b2149	mglA	8.08701	1.6823	Methyl-galactoside transporter
b2150	mglB	40.3944	4.09417	D-galactose-, D-glucose-binding protein, periplasmic; substrate recognition for transport and chemotaxis; binds calcium
b2148	mglC	n.s.	n.s.	Methyl-galactoside transport and galactose taxis
b0963	mgsA	n.s.	n.s.	Methylglyoxal synthase
b0353	mhpT	n.s.	n.s.	Predicted 3-hydroxyphenylpropionic acid import transporter
b1594	mlc	23.4938	1.59809	Global transcriptional repressor; regulates pts operon expression at P0; required for anaerobic growth on glucosamine, binds nagC promoters; regulates manX and malT; makes large colonies; autorepressor
b0731	mngA	n.s.	n.s.	2-O-alpha-mannosyl-D-glycerate transport, EIIABC component; PTS system; overproduction suppresses the defective ompC thermoresponse of a micF mutant
b0732	mngB	n.s.	n.s.	alpha-Mannosidase, 2-O-alpha-mannosyl-D-glycerate catabolism
b3599	mtlA	n.s.	n.s.	Mannitol-specific Enzyme IIABC of PTS transport system
b3600	mtlD	n.s.	n.s.	Mannitol-1-phosphate dehydrogenase, NAD-dependent
b2429	murP	n.s.	n.s.	N-acetylmuramic acid permease, EIIBC component, PTS system
b0677	nagA	n.s.	n.s.	N-acetylglucosamine-6-phosphate deacetylase
b0678	nagB	n.s.	n.s.	Glucosamine-6-phosphate deaminase; hexameric trimer of dimers
b0676	nagC	n.s.	n.s.	Transcriptional regulator of nag operon
b0679	nagE	n.s.	n.s.	PTS system EIIABC(Nag) component; N-acetylglucosamine transport
b1119	nagK	n.s.	n.s.	N-Acetyl-D-glucosamine kinase; phosphorylates GlcNAc in the cytoplasm
b1107	nagZ	n.s.	n.s.	beta-N-Acetylglucosaminidase
b3223	nanE	n.s.	n.s.	Probable N-acetylmannosamine-6-phosphate 2-epimerase
b3222	nanK	n.s.	n.s.	N-acetyl-D-mannosamine (ManNAc) kinase
b3224	nanT	n.s.	n.s.	Sialic acid transporter
b3662	nepI	-6.22479	0.566638	Purine ribonucleoside exporter; 6-mercaptopurine resistance
b3206	npr	n.s.	n.s.	NPr, N-regulated HPr-like protein
b1047	opgC	-7.0858	0.879249	Succinylation of osmoregulated periplasmic glucans (OPGs); membrane protein
b1049	opgH	n.s.	n.s.	Membrane glycosyltransferase, OPG biosynthesis
b1896	otsA	-4.73581	0.599971	Trehalose phosphate synthase; cold- and heat- induced; required for viability at 4C; rpoS regulon
b1897	otsB	n.s.	n.s.	Trehalose phosphate phosphatase; cold- and heat- induced; required for viability at 4C; rpoS regulon; HAD17
b3916	pfkA	n.s.	n.s.	6-phosphofructokinase-1; allosteric: activated by MgNDPs, inhibited by PEP; homoterameric
b1723	pfkB	n.s.	n.s.	6-phosphofructokinase-2; homotetrameric; allosteric: inhibited by MgATP
b1023	pgaB	n.s.	n.s.	Poly-beta-1,6-N-acetyl-D-glucosamine (PGA) N-deacetylase; deacetylase required for biofilm adhesin polysaccharide PGA export; outer membrane lipoprotein
b4025	pgi	n.s.	n.s.	Glucose-6-phosphate isomerase
b2926	pgk	n.s.	n.s.	Phosphoglycerate kinase
b0767	pgl	n.s.	n.s.	6-phosphogluconolactonase, pentose phosphate shunt
b0688	pgm	n.s.	n.s.	Phosphoglucomutase
b4094	phnN	n.s.	n.s.	Carbon-phosphorus lyase complex, ribose 1,5-bisphosphokinase subunit; also functions in an alternative pathway for PRPP formation
b1702	ppsA	n.s.	n.s.	Phosphoenolpyruvate synthase; PEP synthase
b3355	prkB	n.s.	n.s.	Predicted phosphoribulokinase
b4111	proP	-5.02528	0.273317	Proline/betaine permease, minor; osmosensor/osmoregulator
b0331	prpB	n.s.	n.s.	2-Methylisocitrate lyase; propionate catabolism via 2-methlycitrate cycle, characterized primarily in Salmonella
b0334	prpD	n.s.	n.s.	2-Methylcitrate dehydratase, 2-methylisocitrate hydratase; propionate catabolism via 2-methlycitrate cycle; active on citrate and isocitrate; responsible for residual apparent aconitase activity in acnAB double mutant; monomeric iron-sulfur protein
b2166	psuK	n.s.	n.s.	Pseudouridine kinase; enzyme; pseudouridine utilization
b1101	ptsG	n.s.	n.s.	Glucose phophotransferase Enzyme IIBC(Glc); glucose permease; dimeric
b2415	ptsH	n.s.	n.s.	PTS system histidine phosphocarrier protein Hpr; phosphohistidinoprotein-hexose phosphotransferase
b2416	ptsI	n.s.	n.s.	Phosphotransferase system enzyme I
b3204	ptsN	n.s.	n.s.	Nitrogen regulatory protein, PTS system EIIA(Ntr) component
b1854	pykA	n.s.	n.s.	Pyruvate kinase II, minor
b1676	pykF	-8.04094	0.488262	Pyruvate kinase I, fructose 1,6-bisphosphate-activated
b3749	rbsA	9.46813	1.41852	D-ribose high-affinity transport system
b3751	rbsB	5.71584	0.282701	D-ribose binding protein, periplasmic; substrate recognition for transport and chemotaxis
b3750	rbsC	n.s.	n.s.	D-ribose high-affinity transport system, membrane component
b3748	rbsD	9.09063	2.02324	D-ribose pyranase; interconverts beta-pyran and beta-furan forms of D-ribose; related to fucose mutarotase FucU
b3752	rbsK	n.s.	n.s.	Ribokinase
b3903	rhaA	n.s.	n.s.	L-Rhamnose isomerase
b3904	rhaB	n.s.	n.s.	Rhamnulokinase
b3902	rhaD	n.s.	n.s.	Rhamnulose-1-phosphate aldolase; homotetrameric
b2245	rhmA	n.s.	n.s.	2-keto-3-deoxy-L-rhamnonate aldolase
b2246	rhmT	n.s.	n.s.	Predicted transporter, function unknown
b3386	rpe	n.s.	n.s.	D-ribulose-5-phosphate 3-epimerase
b2914	rpiA	n.s.	n.s.	Ribose-5-phosphate isomerase A, alkali-inducible
b4090	rpiB	14.0024	2.78843	Ribose-5-phosphate isomerase B; allose-6-phosphate isomerase
b0070	setA	n.s.	n.s.	Broad specificity sugar efflux transporter
b2170	setB	n.s.	n.s.	Glucose and lactose efflux transporter
b3659	setC	n.s.	n.s.	Putative arabinose efflux transporter
b0146	sfsA	n.s.	n.s.	Overexpression increases maltose utilization; stimulates MalQ
b3583	sgbE	n.s.	n.s.	L-ribulose 5-phosphate 4-epimerase; required for the aerobic utilization of L-ascorbate
b3581	sgbH	n.s.	n.s.	3-keto-L-gulonate-6-phosphate decarboxylase; required for the aerobic utilization of L-ascorbate
b3582	sgbU	n.s.	n.s.	L-xylulose 5-phosphate 3-epimerase; required for the aerobic utilization of L-ascorbate
b4302	sgcA	n.s.	n.s.	Predicted phosphotransferase enzyme IIA
b4565	sgcB	n.s.	n.s.	Predicted phosphotransferase enzyme IIB, function unknown
b4304	sgcC	n.s.	n.s.	Predicted phosphotransferase enzyme IIC
b4301	sgcE	n.s.	n.s.	Predicted pentose-5-phosphate 3-epimerase
b4300	sgcR	n.s.	n.s.	Putative sgc cluster transcriptional regulator
b4305	sgcX	n.s.	n.s.	Peptidase homolog, function unknown
b2702	srlA	6.61758	1.23874	D-glucitol-specific enzyme II of phosphotransferase system
b2704	srlB	5.36048	2.01758	D-glucitol (sorbitol)-specific enzyme III of the phosphotransferase system
b2703	srlE	7.29782	2.0962	Glucitol/sorbitol-specific enzyme IIB component of PTS
b2708	srlQ	n.s.	n.s.	D-arabinose 5-phosphate isomerase
b2707	srlR	n.s.	n.s.	Regulatory gene for srl operon
b2533	suhB	-4.45047	0.36882	Inositol-1-monophosphatase; mutation suppresses TS growth phenotype of rpoH15, dnaB121, and secY24; suhB mutations confers CS growth
b4252	tabA	n.s.	n.s.	Reduces fimA expression and influences biofilm formation
b2464	talA	-5.2372	0.52425	Transaldolase A; creBC regulon
b0008	talB	n.s.	n.s.	Transaldolase B
b2935	tktA	n.s.	n.s.	Transketolase A; binds Zn(II)
b2465	tktB	n.s.	n.s.	Transketolase B; binds Zn(II)
b0994	torT	4.90111	1.13731	Periplasmic TMAO binding protein; required for ToSrR response to TMAO
b3919	tpiA	-6.50537	0.476838	Triosephosphate isomerase
b1197	treA	n.s.	n.s.	Trehalase, periplasmic
b4240	treB	37.5792	10.5223	Trehalose permease PTS EIIBC component
b4239	treC	13.3845	1.50516	Trehalose-6-phosphate hydrolase, osmoprotectant
b3519	treF	-4.22556	0.130474	Cytoplasmic trehalase
b3364	tsgA	-21.1266	2.99677	Putative transporter, tellurite-inducible, function unknown; also induced by selenite
b3063	ttdT	n.s.	n.s.	L-tartrate/succinate antiporter; needed for L-tatrate uptake and tartrate induction of ttdAB
b3452	ugpA	n.s.	n.s.	sn-Glycerol-3-phosphate transport system, integral membrane protein
b3453	ugpB	n.s.	n.s.	sn-Glycerol-3-phosphate transport system, periplasmic binding protein
b3450	ugpC	n.s.	n.s.	sn-Glycerol-3-phosphate transport system, ABC family permease
b3451	ugpE	n.s.	n.s.	sn-Glycerol-3-P transport system; membrane protein
b3667	uhpC	n.s.	n.s.	Glc6P transporter; membrane sensor recognizing external glucose-6-phosphate (Glc6P) and, in concert with UhpB, inducing uhpT
b3666	uhpT	n.s.	n.s.	Hexose phosphate permease; fosfomycin sensitivity; monomeric
b1617	uidA	n.s.	n.s.	beta-D-Glucuronidase
b1616	uidB	n.s.	n.s.	Glucuronide permease, inactive point mutant
b4193	ulaA	n.s.	n.s.	Ascorbate-specific PTS system EIIC component; L-ascorbate uptake
b4194	ulaB	n.s.	n.s.	Ascorbate-specific PTS system EIIB component; L-ascorbate uptake
b4195	ulaC	n.s.	n.s.	Ascorbate-specific PTS system EIIA component; L-ascorbate uptake
b4196	ulaD	n.s.	n.s.	3-keto-L-gulonate-6-phosphate decarboxylase; involved in the utilization of L-ascorbate by anaerobic fermentation; dimeric
b4197	ulaE	n.s.	n.s.	L-xylulose 5-phosphate 3-epimerase; involved in the utilization of L-ascorbate by anaerobic fermentation
b4198	ulaF	n.s.	n.s.	L-ribulose 5-phosphate 4-epimerase; involved in the utilization of L-ascorbate by anaerobic fermentation
b4192	ulaG	n.s.	n.s.	L-ascorbate-6-phosphate lactonase, involved in the utilization of L-ascorbate by anaerobic fermentation; has phosphodiesterase activity
b4191	ulaR	n.s.	n.s.	Repressor for the L-ascorbate utilization (ula) divergon
b3091	uxaA	8.37001	0.729235	D-Altronate hydrolase (hydratase), Fe(2)-requiring; galacturonate branch of hexuronate pathway
b1521	uxaB	4.3336	0.228818	D-Altronate oxidoreductase, NAD-dependent; galacturonate branch of hexuronate pathway
b3092	uxaC	9.06511	1.23181	Uronate isomerase; galacturonate branch of hexuronate pathway
b4322	uxuA	11.1325	1.60903	D-Mannonate dehydratase (hydrolase); Fe(2)-requiring; glucuronate branch of hexuronate pathway
b4323	uxuB	8.87441	0.812579	D-Mannonate oxidoreductase, NAD-dependent; glucuronate branch of hexuronate pathway
b3565	xylA	n.s.	n.s.	D-Xylose isomerase
b3564	xylB	n.s.	n.s.	D-xylulose kinase
b3566	xylF	17.7098	3.804	Periplasmic xylose-binding protein, transport system
b3567	xylG	n.s.	n.s.	D-Xylose ABC transporter ATP-binding subunit, fused tandem domains
b3568	xylH	n.s.	n.s.	D-xylose ABC transporter permease subunit
b1528	ydeA	-11.0429	0.495943	Arabinose efflux transporter, arabinose-inducible
b1534	ydeE	n.s.	n.s.	Putative arabinose efflux transporter
b1769	ydjE	4.67836	0.344243	Predicted transporter, function unknown; inner membrane protein
b1770	ydjF	4.92415	0.298369	Predicted transcriptional regulator, function unknown
b1772	ydjH	n.s.	n.s.	Putative sugar kinase, function unknown
b1773	ydjI	n.s.	n.s.	Putative sugar 1,6-bisphosphate aldolase, function unknown
b1775	ydjK	5.11812	1.14291	Putative sugar transporter, function unknown
b4210	ytfF	n.s.	n.s.	Probable amino acid exporter, DUF6 family
b4227	ytfQ	4.7387	0.908008	Galactofuranose binding protein, periplasmic; part of a predicted ABC transporter YtfQRT-YjfF probably specific for galactofuranse transport
b4485	ytfR	4.35063	0.346095	Predicted ABC transporter ATP-binding protein; part of a predicted ABC transporter YtfQRT-YjfF probably specific for galactofuranse transport
b4230	ytfT	5.42082	1.058	Predicted ABC transporter permease protein; part of a predicted ABC transporter YtfQRT-YjfF probably specific for galactofuranse transport
b4395	ytjC	n.s.	n.s.	Phosphatase, function unknown; multicopy suppressor of serB
b1852	zwf	n.s.	n.s.	Glucose-6-phosphate 1-dehydrogenase

## Sheet: Tab 2
Respiration and electron transport chain:
Gene ID	Gene Name	Av. FC	Error	Description
b0114	aceE	n.s.	n.s.	Pyruvate dehydrogenase, decarboxylase component E1; acetate requirement
b0115	aceF	n.s.	n.s.	Pyruvate dehydrogenase, dihydrolipoamide acetyltransferase E2; acetate requirement
b1415	aldA	7.76308	0.442372	Aldehyde dehydrogenase, NAD-dependent; active on lactaldehyde, glycolaldehyde, and other aldehydes
b3588	aldB	4.89399	1.47562	Aldehyde dehydrogenase, NADP-dependent; tetrameric
b3734	atpA	n.s.	n.s.	ATP synthase subunit alpha, membrane-bound, F1 sector
b3738	atpB	n.s.	n.s.	ATP synthase subunit a, membrane-bound, F0 sector
b3731	atpC	n.s.	n.s.	ATP synthase subunit epsilon, membrane-bound, F1 sector
b3732	atpD	n.s.	n.s.	ATP synthase subunit beta, membrane-bound, F1 sector
b3737	atpE	n.s.	n.s.	ATP synthase subunit c, membrane-bound, F0 sector; DCCD-binding
b3736	atpF	n.s.	n.s.	ATP synthase subunit b, membrane-bound, F0 sector
b3733	atpG	n.s.	n.s.	ATP synthase subunit gamma, membrane-bound, F1 sector
b3735	atpH	n.s.	n.s.	ATP synthase subunit delta, membrane-bound, F1 sector
b3739	atpI	n.s.	n.s.	ATP synthase, membrane-bound accessory factor
b0978	cbdA	n.s.	n.s.	Cytochrome bd-II oxidase subunit I
b0979	cbdB	n.s.	n.s.	Cytochrome bd-II oxidase subunit II
b1418	cybB	n.s.	n.s.	Cytochrome b561
b0733	cydA	n.s.	n.s.	Cytochrome d (bd-I) terminal oxidase subunit I; upregulated in biofilms and microaerobic conditions; aerobically repressed by H-NS; anaerobically repressed by Fnr
b0734	cydB	n.s.	n.s.	Cytochrome d (bd-I) terminal oxidase subunit II; upregulated in biofilms and microaerobic conditions; aerobically repressed by H-NS; anaerobically repressed by Fnr
b0432	cyoA	n.s.	n.s.	Cytochrome o oxidase subunit II, lipoprotein; also called cytochrome bo(3) ubiquinol oxidase subunit II
b0431	cyoB	n.s.	n.s.	Cytochrome o oxidase subunit I, quinone-binding domain; cytochrome bo(3) ubiquinol oxidase subunit I
b0430	cyoC	n.s.	n.s.	Cytochrome o oxidase subunit III; cytochrome bo(3) ubiquinol oxidase subunit III
b0429	cyoD	n.s.	n.s.	Cytochrome o oxidase subunit IV; cytochrome bo(3) ubiquinol oxidase subunit IV
b2133	dld	n.s.	n.s.	D-lactate dehydrogenase; vinylglycolate resistance, FAD enzyme
b0894	dmsA	n.s.	n.s.	DMSO reductase subunit A, anaerobic, periplasmic
b0895	dmsB	n.s.	n.s.	DMSO reductase subunit B; apparent Fe-S binding subunit; anaerobic
b0896	dmsC	n.s.	n.s.	DMSO reductase subunit C, periplasmic; has a membrane bound anchor
b1185	dsbB	n.s.	n.s.	Disulfide oxidoreductase, membrane-spanning protein; oxidizes periplasmic DsbA; DTT-sensitive phenotype
b1850	eda	n.s.	n.s.	KHG/KDPG aldolase; 2-keto-4-hydroxyglutarate aldolase and 2-keto-3-deoxy-6-phosphogluconate aldolase activities; homotrimeric; 2-keto-4-hydroxyglutarate aldolase is also known as 4-hydroxy-2-oxoglutarate aldolase. 2-keto-3-deoxy-6-phosphogluconate aldolas
b1851	edd	n.s.	n.s.	Phosphogluconate dehydratase; growth on gluconate
b1474	fdnG	n.s.	n.s.	Formate dehydrogenase-N, selenopeptide, anaerobic; FDH-N; periplasmic
b1475	fdnH	n.s.	n.s.	Formate dehydrogenase-N, Fe-S subunit, anaerobic; FDH-N; periplasmic
b1476	fdnI	n.s.	n.s.	Formate dehydrogenase-N, cytochrome subunit, anaerobic; FDH-N
b3894	fdoG	3.84331	0.243964	Formate dehydrogenase-O, selenopeptide, aerobic
b3893	fdoH	n.s.	n.s.	Formate dehydrogenase-O Fe-S subunit, aerobic
b3892	fdoI	n.s.	n.s.	Formate dehydrogenase-O cytochrome b556 subunit, aerobic
b3924	fpr	5.55462	0.353028	Ferredoxin NADP+ reductase; anaerobic; cloned fpr gene suppresses unlinked mvrA mutation
b4154	frdA	n.s.	n.s.	Fumarate reductase flavoprotein subunit
b4153	frdB	n.s.	n.s.	Fumarate reductase iron-sulfur protein subunit
b4152	frdC	n.s.	n.s.	Fumarate reductase membrane anchor polypeptide
b4151	frdD	n.s.	n.s.	Fumarate reductase membrane anchor polypeptide
b2799	fucO	11.2752	1.28341	Lactaldehyde reductase
b1779	gapA	n.s.	n.s.	Glyceraldehyde 3-P dehydrogenase A
b0124	gcd	-39.4882	1.76329	Glucose dehydrogenase (pyrroloquinoline-quinone) quinoprotein; inner membrane protein
b2241	glpA	55.8767	4.06062	Anaerobic glycerol-3-phosphate dehydrogenase subunit A; FAD-binding
b2242	glpB	17.4155	2.85349	Anaerobic glycerol-3-phosphate dehydrogenase subunit B; FMN-binding
b2243	glpC	n.s.	n.s.	Anaerobic glycerol-3-phosphate dehydrogenase subunit C; 4Fe-4S iron-sulfur cluster and membrane anchor
b3426	glpD	19.0575	1.92095	sn-Glycerol-3-phosphate dehydrogenase (aerobic); membrane-anchored
b3926	glpK	12.2841	1.03873	Glycerol kinase
b2029	gnd	n.s.	n.s.	6-phosphogluconate dehydrogenase, decarboxylating
b0972	hyaA	n.s.	n.s.	Hydrogenase 1 small subunit [NiFe], periplasmic
b0973	hyaB	n.s.	n.s.	Hydrogenase 1 large subunit [NiFe], periplasmic
b0974	hyaC	n.s.	n.s.	Hydrogenase 1 b-type cytochrome subunit
b2996	hybA	5.7134	0.711874	Hydrogenase 2 component, periplasmic; possibly electron acceptor for hydrogenase 2 small subunit; probably binds 4 4Fe-4S clusters
b2995	hybB	n.s.	n.s.	Hydrogenase 2 cytochrome b type component, probably
b2994	hybC	n.s.	n.s.	Hydrogenase 2 [Ni Fe] large subunit, periplasmic
b2997	hybO	4.33325	0.427841	Hydrogenase 2 [Ni, Fe], small subunit, periplasmic
b2723	hycC	n.s.	n.s.	Formate hydrogenlyase complex inner membrane protein
b2482	hyfB	n.s.	n.s.	Putative hydrogenase 4 component B; membrane protein of Hyf electron transfer complex of FHL system
b2485	hyfE	n.s.	n.s.	Hydrogenase 4 component E; membrane protein of Hyf electron transfer complex of FHL system
b1136	icd	n.s.	n.s.	Isocitrate dehydrogenase, NADP(+)-specific; e14 attachment site
b1136	icd	n.s.	n.s.	Isocitrate dehydrogenase, NADP(+)-specific; e14 attachment site
b0073	leuB	n.s.	n.s.	3-isopropylmalate dehydrogenase, NAD(+)-dependent
b0116	lpd	n.s.	n.s.	Lipoamide dehydrogenase, NADH-dependent; E3 component of pyruvate and 2-oxoglutarate dehydrogenase complexes; also functions as glycine cleavage system L protein; binds Zn(II)
b1479	maeA	n.s.	n.s.	Malic enzyme, NAD-dependent; NAD-ME
b2463	maeB	n.s.	n.s.	Malic enzyme, NADP-dependent; NADP-ME
b2210	mqo	-6.97184	1.2126	Malate oxidoreductase; possibly previously described FAD-dependent phospholipid-activated malate oxidase
b0750	nadA	n.s.	n.s.	Quinolinate synthase, [4Fe-4S] cluster subunit, A protein
b2574	nadB	-13.5091	1.86276	L-aspartate oxidase, FAD-dependent; quinolinate synthase flavoprotein subunit, B protein; LASPO
b0109	nadC	n.s.	n.s.	Quinolinate phosphoribosyl transferase
b0639	nadD	n.s.	n.s.	Nicotinate mononucleotide adenylyltransferase, NAD(P) biosynthesis
b1740	nadE	n.s.	n.s.	NAD synthase, ammonia dependent
b2615	nadK	n.s.	n.s.	ATP-NAD kinase
b4390	nadR	n.s.	n.s.	NMN adenylyltransferase/ribosylnicotinamide kinase/repressor; nicotinamide mononucleotide adenyltransferase; involved in transport of nicotinamide riboside (NR) by PnuC
b1224	narG	n.s.	n.s.	Nitrate reductase I (NRA), alpha subunit
b1225	narH	n.s.	n.s.	Nitrate reductase I (NRA), beta subunit
b1227	narI	7.57933	1.11207	Nitrate reductase I (NRA), gamma subunit
b1465	narV	n.s.	n.s.	Nitrate reductase II (NRZ), gamma-subunit
b1467	narY	n.s.	n.s.	Nitrate reductase II (NRZ), beta subunit
b1468	narZ	n.s.	n.s.	Nitrate reductase II (NRZ), alpha subunit
b1109	ndh	n.s.	n.s.	Respiratory NADH dehydrogenase II; NADH:ubiquinone oxidoreductase II; membrane-bound flavoprotein; cupric reductase
b0851	nfsA	3.7866	0.275664	Nitroreductase A; oxygen-insensitive, NADPH, FMN-dependent, major; reduces a variety of nitroaromatics, e.g. dihydropteridine, nitrofurantoin, nitrofurazone, quinones; SoxS regulon; homodimeric
b4070	nrfA	n.s.	n.s.	Cytochrome c nitrite reductase, cytochrome c552, periplasmic; formate-dependent; required for NO synthesis
b4071	nrfB	n.s.	n.s.	Cytochrome c nitrite reductase, pentaheme cytochrome, periplasmic; formate-dependent; required for NO synthesis
b4072	nrfC	n.s.	n.s.	Formate-dependent nitrite reduction; nonheme FE-S protein, ferredoxin-like
b4073	nrfD	n.s.	n.s.	Formate-dependent nitrite reduction; transmembrane protein similar to QOR
b2288	nuoA	n.s.	n.s.	NADH:ubiquinone oxidoreductase subunit A, complex I; NADH dehydrogenase I
b2287	nuoB	n.s.	n.s.	NADH:ubiquinone oxidoreductase subunit B, complex I; NADH dehydrogenase I
b2286	nuoC	n.s.	n.s.	NADH:ubiquinone oxidoreductase, fused CD subunit, complex I; NADH dehydrogenase I
b2285	nuoE	n.s.	n.s.	NADH:ubiquinone oxidoreductase subunit E, complex I; NADH dehydrogenase I
b2284	nuoF	n.s.	n.s.	NADH:ubiquinone oxidoreductase subunit F, complex I; NADH dehydrogenase I
b2283	nuoG	n.s.	n.s.	NADH:ubiquinone oxidoreductase subunit G, complex I; NADH dehydrogenase I
b2282	nuoH	n.s.	n.s.	NADH:ubiquinone oxidoreductase subunit H, complex I; NADH dehydrogenase I
b2281	nuoI	n.s.	n.s.	NADH:ubiquinone oxidoreductase subunit I, complex I; NADH dehydrogenase I
b2280	nuoJ	n.s.	n.s.	NADH:ubiquinone oxidoreductase subunit J, complex I; NADH dehydrogenase I
b2279	nuoK	n.s.	n.s.	NADH:ubiquinone oxidoreductase subunit K, complex I; NADH dehydrogenase I
b2278	nuoL	n.s.	n.s.	NADH:ubiquinone oxidoreductase subunit L, complex I; NADH dehydrogenase I; NuoL facilitates the uptake of Na(+), is homologus to antiporters, and is implicated in proton pumping
b2277	nuoM	n.s.	n.s.	NADH:ubiquinone oxidoreductase subunit M, complex I; contains the ubiquinone-binding site, is homologus to antiporters, and is implicated in proton pumping
b2276	nuoN	n.s.	n.s.	NADH:ubiquinone oxidoreductase subunit N, complex I; NADH dehydrogenase I
b3403	pck	29.8501	2.37204	Phosphoenolpyruvate carboxykinase [ATP]
b1378	pfo	4.69349	0.284508	Probable pyruvate-flavodoxin oxidoreductase
b4025	pgi	n.s.	n.s.	Glucose-6-phosphate isomerase
b1768	pncA	n.s.	n.s.	Pyrazinamidase/nicotinamidase
b0931	pncB	-4.31627	0.113375	Nicotinate phosphoribosyltransferase
b2700	pncC	n.s.	n.s.	NMN amidohydrolase
b1603	pntA	n.s.	n.s.	Proton-translocating NAD(P) transhydrogenase, alpha subunit; membrane protein
b1602	pntB	n.s.	n.s.	Proton-translocating NAD(P) transhydrogenase, beta subunit; membrane protein
b0871	poxB	n.s.	n.s.	Pyruvate oxidase
b1300	puuC	-17.0101	1.17309	gamma-Glutamyl-gamma-aminobutyraldehyde dehydrogenase, NAD-dependent; gamma-Aminobutyraldehyde dehydrogenase, NAD-dependent; Succinate semialdehyde dehydrogenase, NAD-dependent; putrescine utilization pathway
b0304	rclA	-5.83175	0.491608	Predicted pyridine nucleotide-disulfide oxidoreductase
b1627	rsxA	n.s.	n.s.	Required for the reduction of SoxR; inner membrane protein
b1628	rsxB	n.s.	n.s.	Required for the reduction of SoxR; predicted iron-sulfur protein
b1629	rsxC	-4.81619	0.312498	Electron transport complex protein required for the reduction of SoxR; predicted membrane-associated NADH oxidoreductase
b1630	rsxD	-4.75689	0.267422	Electron transport complex protein required for the reduction of SoxR; predicted membrane protein
b1632	rsxE	-5.1237	0.55504	Required for the reduction of SoxR; membrane protein
b1631	rsxG	-4.19606	0.298833	Required for the reduction of SoxR; putative membrane protein
b0723	sdhA	n.s.	n.s.	Succinate dehydrogenase (SQR) flavoprotein subunit; succinate:ubiquinone oxidoreductase (SQR); complex II of aerobic respiration
b0724	sdhB	n.s.	n.s.	Succinate dehydrogenase (SQR) iron-sulfur protein; succinate:ubiquinone oxidoreductase (SQR); complex II of aerobic respiration
b0721	sdhC	n.s.	n.s.	Succinate dehydrogenase (SQR) cytochrome b556; membrane anchor; succinate:ubiquinone oxidoreductase (SQR); complex II of aerobic respiration
b0722	sdhD	n.s.	n.s.	Succinate dehydrogenase (SQR) hydrophobic subunit; succinate:ubiquinone oxidoreductase (SQR); complex II of aerobic respiration
b3962	sthA	n.s.	n.s.	Soluble pyridine nucleotide transhydrogenase
b0726	sucA	n.s.	n.s.	2-oxoglutarate dehydrogenase, E1 component; yields succinyl-CoA and CO(2); also knwon as alpha-ketoglutarate dehydrogenase
b0727	sucB	n.s.	n.s.	2-oxoglutarate dehydrogenase, E2 component; dihydrolipoamide succinyltransferase; acid-inducible; yields succinyl-CoA and CO(2); also knwon as alpha-ketoglutarate dehydrogenase
b0997	torA	n.s.	n.s.	Molybdoprotein trimethylamine N-oxide reductase
b0996	torC	n.s.	n.s.	c-Type cytochrome
b0998	torD	n.s.	n.s.	Redox enzyme maturation protein (REMP) for TorA; cytoplasmic chaperone for TorA activation; GTPase; protects TorA TAT signal peptide from degradation
b1004	wrbA	-5.6666	0.561333	NAD(P)H:quinone oxidoreductase, type IV NQO; may protect against oxidative stress; dimeric, binds one FMN per monomer
b0599	ybdH	20.2553	3.41297	Catalyzes the NADPH-dependent reduction of 2-oxoglutarate and 2-oxobutanoate, leading to the respective 2-hydroxycarboxylate.
b0801	ybiC	-5.14037	0.295059	Function unknown, lactate, malate dehydrogenase family
b1057	yceJ	n.s.	n.s.	Cytochrome b561 homolog, function unknown
b1670	ydhU	160.07	148.528	Function unknown, FNR, NarL and NarP regulons; homologous to Salmonella PhsC
b1971	yedY	95.9807	7.87344	Protein-methionine-sulfoxide reductase catalytic subunit MsrP
b1972	yedZ	112.601	15.8266	Protein-methionine-sulfoxide reductase heme-binding subunit MsrQ
b0307	ykgF	5.09462	0.907805	Electron transport protein with ferridoxin-like domain; predicted lactate-related catabolism; function unknown
b1590	ynfH	n.s.	n.s.	S- and N-oxide reductase, membrane bound anchor
b1974	yodB	n.s.	n.s.	Cytochrome b561 homolog, function unknown
b3011	yqhD	63.5045	2.32824	Aldehyde reductase, NADPH-dependent; protects against lipid oxidation and glyoxal toxixity; furfural reductase; contains Zn; homodimer
b1852	zwf	n.s.	n.s.	Glucose-6-phosphate 1-dehydrogenase
Glucose metabolism:
Gene ID	Gene Name	Av. FC	Error	Description
b4015	aceA	n.s.	n.s.	Isocitrate lyase, acetate utilization, glyoxylate shunt; tetrameric
b4014	aceB	n.s.	n.s.	Malate synthase A; glyoxylate shunt enzyme
b0114	aceE	n.s.	n.s.	Pyruvate dehydrogenase, decarboxylase component E1; acetate requirement
b0115	aceF	n.s.	n.s.	Pyruvate dehydrogenase, dihydrolipoamide acetyltransferase E2; acetate requirement
b1276	acnA	n.s.	n.s.	Aconitase A, stationary phase induced; iron-sulfur cluster; apo-enzyme binds mRNA for negative translational autoregulation; negatively regulated by ryhB RNA as part of indirect positive regulation by Fur
b0118	acnB	n.s.	n.s.	Aconitase B; 2-methylaconitate hydratase; apo-enzyme binds mRNA for negative translational autoregulation; iron-sulfur cluster; monomeric
b1850	eda	n.s.	n.s.	KHG/KDPG aldolase; 2-keto-4-hydroxyglutarate aldolase and 2-keto-3-deoxy-6-phosphogluconate aldolase activities; homotrimeric; 2-keto-4-hydroxyglutarate aldolase is also known as 4-hydroxy-2-oxoglutarate aldolase. 2-keto-3-deoxy-6-phosphogluconate aldolas
b1851	edd	n.s.	n.s.	Phosphogluconate dehydratase; growth on gluconate
b2779	eno	n.s.	n.s.	Enolase; phosphoprotein; component of RNA degradosome
b2925	fbaA	n.s.	n.s.	Fructose 1,6-bisphosphate aldolase, class II; binds Zn(II); homodimeric
b2097	fbaB	n.s.	n.s.	Fructose 1,6-bisphosphate aldolase, class I
b4232	fbp	n.s.	n.s.	Fructose-1,6-bisphosphatase; allosteric: inhibited by AMP
b1612	fumA	n.s.	n.s.	Fumarase A, aerobic; negatively regulated by ryhB RNA as part of indirect positive regulation by Fur
b4122	fumB	n.s.	n.s.	Fumarase B, anaerobic
b1611	fumC	6.65994	0.397374	Fumarase C, aerobic
b1779	gapA	n.s.	n.s.	Glyceraldehyde 3-P dehydrogenase A
b3925	glpX	n.s.	n.s.	Fructose 1,6 bisphosphatase; induced by glycerol, in glpFKX operon, not required for growth on glycerol
b0720	gltA	n.s.	n.s.	Citrate synthase; hexameric
b2029	gnd	n.s.	n.s.	6-phosphogluconate dehydrogenase, decarboxylating
b0755	gpmA	n.s.	n.s.	Phosphoglycerate mutase, 2,3-bisphosphoglycerate-dependent; dPGM; Fur regulon; dimeric
b3612	gpmM	n.s.	n.s.	Phosphoglycerate mutase, Mn-dependent, cofactor-independent; iPGM; monomeric
b1136	icd	n.s.	n.s.	Isocitrate dehydrogenase, NADP(+)-specific; e14 attachment site
b0116	lpd	n.s.	n.s.	Lipoamide dehydrogenase, NADH-dependent; E3 component of pyruvate and 2-oxoglutarate dehydrogenase complexes; also functions as glycine cleavage system L protein; binds Zn(II)
b3916	pfkA	n.s.	n.s.	6-phosphofructokinase-1; allosteric: activated by MgNDPs, inhibited by PEP; homoterameric
b1723	pfkB	n.s.	n.s.	6-phosphofructokinase-2; homotetrameric; allosteric: inhibited by MgATP
b4025	pgi	n.s.	n.s.	Glucose-6-phosphate isomerase
b2926	pgk	n.s.	n.s.	Phosphoglycerate kinase
b0767	pgl	n.s.	n.s.	6-phosphogluconolactonase, pentose phosphate shunt
b1702	ppsA	n.s.	n.s.	Phosphoenolpyruvate synthase; PEP synthase
b1854	pykA	n.s.	n.s.	Pyruvate kinase II, minor
b1676	pykF	n.s.	n.s.	Pyruvate kinase I, fructose 1,6-bisphosphate-activated
b3386	rpe	n.s.	n.s.	D-ribulose-5-phosphate 3-epimerase
b2914	rpiA	n.s.	n.s.	Ribose-5-phosphate isomerase A, alkali-inducible
b4090	rpiB	14.0024	2.78843	Ribose-5-phosphate isomerase B; allose-6-phosphate isomerase
b0723	sdhA	n.s.	n.s.	Succinate dehydrogenase (SQR) flavoprotein subunit; succinate:ubiquinone oxidoreductase (SQR); complex II of aerobic respiration
b0724	sdhB	n.s.	n.s.	Succinate dehydrogenase (SQR) iron-sulfur protein; succinate:ubiquinone oxidoreductase (SQR); complex II of aerobic respiration
b0721	sdhC	n.s.	n.s.	Succinate dehydrogenase (SQR) cytochrome b556; membrane anchor; succinate:ubiquinone oxidoreductase (SQR); complex II of aerobic respiration
b0722	sdhD	n.s.	n.s.	Succinate dehydrogenase (SQR) hydrophobic subunit; succinate:ubiquinone oxidoreductase (SQR); complex II of aerobic respiration
b0726	sucA	n.s.	n.s.	2-oxoglutarate dehydrogenase, E1 component; yields succinyl-CoA and CO(2); also knwon as alpha-ketoglutarate dehydrogenase
b0727	sucB	n.s.	n.s.	2-oxoglutarate dehydrogenase, E2 component; dihydrolipoamide succinyltransferase; acid-inducible; yields succinyl-CoA and CO(2); also knwon as alpha-ketoglutarate dehydrogenase
b0728	sucC	n.s.	n.s.	Succinyl CoA synthase beta-subunit; acid-inducible
b0729	sucD	n.s.	n.s.	Succinyl CoA synthase alpha-subunit
b2464	talA	-5.2372	0.52425	Transaldolase A; creBC regulon
b0008	talB	n.s.	n.s.	Transaldolase B
b2935	tktA	n.s.	n.s.	Transketolase A; binds Zn(II)
b2465	tktB	n.s.	n.s.	Transketolase B; binds Zn(II)
b3919	tpiA	-6.50537	0.476838	Triosephosphate isomerase
b0766	ybhA	n.s.	n.s.	Pyridoxal phosphate (PLP) phosphatase; phosphoramidase; physiological role unknown; HAD14
b2930	yggF	n.s.	n.s.	Fructose 1,6 bisphosphatase activity
b1852	zwf	n.s.	n.s.	Glucose-6-phosphate 1-dehydrogenase
Fermentation:
Gene ID	Gene Name	Av. FC	Error	Description
b2296	ackA	n.s.	n.s.	Acetate kinase, produces acetyl phosphate; mutants are fluoroacetate resistant; creBC regulon; binds Zn(II)
b1241	adhE	n.s.	n.s.	Alcohol dehydrogenase, largely anaerobic; aerobic antioxidant; acetaldehyde-CoA dehydrogenase, CoA-linked; allyl alcohol resistance
b4399	creC	n.s.	n.s.	Sensor kinase for CreBC regulon; induced by growth in minimal medium
b0621	dcuC	n.s.	n.s.	C4-dicarboxylate carrier, anaerobic; W3110 has an IS5 insertion
b3227	dcuD	n.s.	n.s.	Predicted transporter, DcuC paralog, function unknown; mutant has no phenotype and dcuD does not complement dcuC mutations
b4079	fdhF	n.s.	n.s.	Formate dehydrogenase H, selenopeptide; molybdate-dependent, sulfur-dependent; part of FHL-1 and FHL-2 (formate hydrogenlyase) complexes
b0904	focA	n.s.	n.s.	Formate channel; mutants are hypophosphite resistance and have elevated intracellular formate and reduced excreted formate
b2492	focB	n.s.	n.s.	Probable bidirectional formate transporter 2
b4154	frdA	n.s.	n.s.	Fumarate reductase flavoprotein subunit
b4153	frdB	n.s.	n.s.	Fumarate reductase iron-sulfur protein subunit
b4152	frdC	n.s.	n.s.	Fumarate reductase membrane anchor polypeptide
b4151	frdD	n.s.	n.s.	Fumarate reductase membrane anchor polypeptide
b3945	gldA	n.s.	n.s.	Glycerol dehydrogenase, NAD+ dependent; 1,2-propanediol (and derivatives) oxidoreductase; D-1-amino-2-propanol:NAD+ oxidoreductase
b3729	glmS	n.s.	n.s.	Glucosamine-6-phosphate synthase; glucosamine--fructose-6-phosphate aminotransferase; C-terminal F6P-binding domain has isomerase activity
b0972	hyaA	n.s.	n.s.	Hydrogenase 1 small subunit [NiFe], periplasmic
b0973	hyaB	n.s.	n.s.	Hydrogenase 1 large subunit [NiFe], periplasmic
b0974	hyaC	n.s.	n.s.	Hydrogenase 1 b-type cytochrome subunit
b2725	hycA	-520.621	151.045	Transcriptional repressor of formate regulon (hyc operon of hydrogenase 3 and formate dehydrogenase H)
b2724	hycB	n.s.	n.s.	Formate hydrogenlyase complex iron-sulfur protein
b2723	hycC	n.s.	n.s.	Formate hydrogenlyase complex inner membrane protein
b2722	hycD	n.s.	n.s.	Formate hydrogenlyase complex inner membrane protein,
b2721	hycE	n.s.	n.s.	Hydrogenase 3 large subunit, [NiFe] cluster; heterodimer
b2720	hycF	n.s.	n.s.	Formate hydrogenlyase complex iron-sulfur protein,
b2719	hycG	n.s.	n.s.	Hydrogenase 3 small subunit
b1380	ldhA	4.54757	0.23455	D-lactate dehydrogenase, NAD-dependent
b3236	mdh	4.10004	0.27151	Malate dehydrogenase, NAD-dependent
b0903	pflB	n.s.	n.s.	Formate acetyltransferase 1; pyruvate formate lyase I; induced anaerobically; radical activated by PflA; deactivated by AdhE
b2297	pta	n.s.	n.s.	Phosphate acetyltransferase, produces acetyl phosphate; creBC regulon; alkali-inducible; binds Zn(II)
b3115	tdcD	n.s.	n.s.	Propionate kinase, anaerobic; non-essential gene
